# Supplementary material
Source: PubMed Central journal article supplement (PMC3415540)
Supplement: mmc1.pdf [file mmc1.pdf]

## **Supplemental Data**

### **Exome Sequencing Followed by Large-Scale Genotyping**

### **Fails to Identify Single Rare Variants of Large Effect**

### **in Idiopathic Generalized Epilepsy**

**Erin L. Heinzen, Chantal Depondt, Gianpiero L. Cavalleri, Elizabeth K. Ruzzo, Nicole M. Walley, Anna C. Need, Dongliang Ge, Min He, Elizabeth T. Cirulli, Qian Zhao, Kenneth D. Cronin, Curtis E. Gumbs, C. Ryan Campbell, Linda K. Hong, Jessica M. Maia, Kevin V. Shianna, Mark McCormack, Rodney A. Radtke, Gerard D. O'Conner, Mohamad A. Mikati, William B. Gallentine, Aatif M. Husain, Saurabh R. Sinha, Krishna Chinthapalli, Ram S. Puranam, James O. McNamara, Ruth Ottman, Sanjay M. Sisodiya, Norman Delanty, and David B. Goldstein**

**Table S3. Reactome Pathway Analysis Results: Top 20 Most Significantly Enriched Pathways in IGE**

| Unadjusted Probability of Seeing N or More Genes in This Pathway by Chance | Number of Genes in Your Query that Map to This Pathway | Total Number of Genes Involved in This Pathway | Name of This Pathway                                                                                        | Gene Symbols Mapping to This Pathway                                                                                                                                                                                                                                                                                                                                  |
|----------------------------------------------------------------------------|--------------------------------------------------------|------------------------------------------------|-------------------------------------------------------------------------------------------------------------|-----------------------------------------------------------------------------------------------------------------------------------------------------------------------------------------------------------------------------------------------------------------------------------------------------------------------------------------------------------------------|
| 6.80E-05                                                                   | 9                                                      | 29                                             | ABC-family proteins mediated transport                                                                      | <i>CFTR, ABCA8, ABCG4, ABCA4, ABCC3, ABCC2, ABCB5, ABCC11, ABCC9</i>                                                                                                                                                                                                                                                                                                  |
| 3.70E-04                                                                   | 44                                                     | 396                                            | Transmembrane transport of small molecules                                                                  | <i>SLCO2A1, SLC1A7, TF, SLC18A1, CFTR, SLC5A2, SLC14A2, NUP133, GABRB2, ATP10D, ABCB5, ATP4B, SLC3A1, SLC2A10, SLC6A19, SLC5A9, ABCA8, ABCG4, SLC35C1, NUP188, SLC47A1, NUP205, SLC30A6, ATP6V1E1, SLC7A6, SLC22A1, SLC7A3, ATP10A, SLC20A2, ADCY7, ABCC2, ATP1A1, SLC17A5, ATP8B1, NUP153, NUP160, SLC27A6, ABCA4, ABCC3, SLC39A6, SLCO1A2, ABCC11, ABCC9, HMOX2</i> |
| 4.10E-04                                                                   | 5                                                      | 11                                             | The ABCC family mediates organic anion transport                                                            | <i>ABCC3, CFTR, ABCC2, ABCC9, ABCC11</i>                                                                                                                                                                                                                                                                                                                              |
| 1.50E-03                                                                   | 17                                                     | 116                                            | Metabolism of carbohydrates                                                                                 | <i>ENO3, GYS2, PHKG2, PYGB, GALE, PRPS1, NUP133, GAPDHS, TREH, SI, LCT, NUP153, NUP160, ENO2, NUP188, PGAM2, NUP205</i>                                                                                                                                                                                                                                               |
| 2.20E-03                                                                   | 5                                                      | 15                                             | Class C/3 (Metabotropic glutamate/pheromone receptors)                                                      | <i>GRM7, GABBR2, TAS1R2, CASR, GRM3</i>                                                                                                                                                                                                                                                                                                                               |
| 2.60E-03                                                                   | 3                                                      | 5                                              | Digestion of dietary carbohydrate                                                                           | <i>TREH, SI, LCT</i>                                                                                                                                                                                                                                                                                                                                                  |
| 2.60E-03                                                                   | 3                                                      | 5                                              | Shc1 binds phosphorylated ERBB2:ERBB3 heterodimers                                                          | <i>ERBB3, ERBB2, NRG1</i>                                                                                                                                                                                                                                                                                                                                             |
| 2.60E-03                                                                   | 3                                                      | 5                                              | Binding of PI3K subunit p85 (PIK3R1) to ERBB2:P-ERBB3 heterodimer                                           | <i>ERBB3, ERBB2, NRG1</i>                                                                                                                                                                                                                                                                                                                                             |
| 2.60E-03                                                                   | 3                                                      | 5                                              | GRB7 binds phosphorylated heterodimer of ERBB2 and ERBB3                                                    | <i>ERBB3, ERBB2, NRG1</i>                                                                                                                                                                                                                                                                                                                                             |
| 2.60E-03                                                                   | 3                                                      | 5                                              | GRB7 events in ERBB2 signaling                                                                              | <i>ERBB3, ERBB2, NRG1</i>                                                                                                                                                                                                                                                                                                                                             |
| 2.60E-03                                                                   | 3                                                      | 5                                              | RNF41 binds neuregulin-activated ERBB3                                                                      | <i>ERBB3, ERBB2, NRG1</i>                                                                                                                                                                                                                                                                                                                                             |
| 4.30E-03                                                                   | 4                                                      | 11                                             | Trans-autophosphorylation of p-Y877-ERBB2 heterodimers                                                      | <i>ERBB3, EGF, ERBB2, NRG1</i>                                                                                                                                                                                                                                                                                                                                        |
| 4.30E-03                                                                   | 4                                                      | 11                                             | Trans-autophosphorylation of ERBB2 heterodimers                                                             | <i>ERBB3, EGF, ERBB2, NRG1</i>                                                                                                                                                                                                                                                                                                                                        |
| 4.40E-03                                                                   | 2                                                      | 2                                              | GABA synthesis                                                                                              | <i>GAD1, GAD2</i>                                                                                                                                                                                                                                                                                                                                                     |
| 4.40E-03                                                                   | 2                                                      | 2                                              | Synthesis of GABA by GAD2                                                                                   | <i>GAD1, GAD2</i>                                                                                                                                                                                                                                                                                                                                                     |
| 4.40E-03                                                                   | 2                                                      | 2                                              | GPR77 binds anaphylatoxins and their desArginated derivatives                                               | <i>GPR77, C5</i>                                                                                                                                                                                                                                                                                                                                                      |
| 4.40E-03                                                                   | 2                                                      | 2                                              | Both hexosaminidase A and B can cleave GalNAc from globoside                                                | <i>HEXB, HEXA</i>                                                                                                                                                                                                                                                                                                                                                     |
| 5.00E-03                                                                   | 3                                                      | 6                                              | PIP2 to PIP3 conversion by PI3K bound to phosphorylated heterodimer of ERBB2 and ERBB3                      | <i>ERBB3, ERBB2, NRG1</i>                                                                                                                                                                                                                                                                                                                                             |
| 5.00E-03                                                                   | 3                                                      | 6                                              | Recruitment of PI3K subunit p110 (PIK3CA) by PIK3R1 bound to phosphorylated heterodimer of ERBB2 and ERBB3. | <i>ERBB3, ERBB2, NRG1</i>                                                                                                                                                                                                                                                                                                                                             |
| 6.10E-03                                                                   | 4                                                      | 12                                             | SHC1 phosphorylation by ERBB2 heterodimers                                                                  | <i>ERBB3, EGF, ERBB2, NRG1</i>                                                                                                                                                                                                                                                                                                                                        |

**Table S4. List of Regions Implicated as IGE Link Loci through Linkage Studies**

| Region or Gene Implicated by a Linkage Study | Study/PubmedID                                                                                                          |
|----------------------------------------------|-------------------------------------------------------------------------------------------------------------------------|
| 10p11.2                                      | Kinirons P et al. Am J Med Genet A. 2008 Mar 1;146A(5):578-84. PMID:18241056                                            |
| 10q25.2-26.11                                | Puranam RS et al. Ann Neurol. 2005 Sep;58(3):449-58. PMID:16130088                                                      |
| 9q32-33                                      | Baykan B et al. Epilepsia. 2004 May;45(5):479-87. PMID:15101829                                                         |
| 8q24                                         | Plaster NM et al. Neurology. 1999 Oct 12;53(6):1180-3. PMID:10522869                                                    |
| 8q24                                         | Fong GC et al. Am J Hum Genet. 1998 Oct;63(4):1117-29. PMID:9758624                                                     |
| 8p23-p21                                     | Baulac S et al. Arch Neurol. 2008 Jul;65(7):943-51. PMID:18625863                                                       |
| 8p12                                         | Durner M et al. Am J Hum Genet. 1999 May;64(5):1411-9. PMID:10205274                                                    |
| 6p21.32                                      | Pal DK et al. Am J Hum Genet. 2003 Aug;73(2):261-70. Epub 2003 Jun 25. PMID:12830434                                    |
| <i>EFHC1</i>                                 | Suzuki T et al. Neurosci Lett. 2006 Sep 11;405(1-2):126-31. Epub 2006 Jul 28. PMID:16876319                             |
| <i>EFHC1</i>                                 | Suzuki T et al. Biochem Biophys Res Commun. 2001 Nov 2;288(3):626-36. PMID:11676489                                     |
| <i>GABRA1</i>                                | Cossette P et al. Nat Genet. 2002 Jun;31(2):184-9. Epub 2002 May 6. PMID: 11992121                                      |
| 5q13.3-5q23.1                                | Durner M et al. Ann Neurol. 2001 Mar;49(3):328-35. PMID:11261507                                                        |
| 3q26                                         | Sander T et al. Hum Mol Genet. 2000 Jun 12;9(10):1465-72. PMID:10888596                                                 |
| 3q13.2-21.2                                  | Kapoor A et al. Ann Neurol. 2008 Aug;64(2):158-67. PMID:18756473                                                        |
| 3p23-p14                                     | Chioza BA et al. Epilepsy Res. 2009 Dec;87(2-3):247-55. Epub 2009 Oct 17. PMID:19837565                                 |
| 3p22.3-22.2                                  | Blair MA et al. Epilepsia. 2011 May;52(5):993-9. doi: 10.1111/j.1528-1167.2011.03059.x. Epub 2011 Apr 11. PMID:21480884 |
| 3p14.2-p12.1                                 | Zara F et al. Neurology. 1998 Aug;51(2):493-8. Erratum in: Neurology 1998 Nov;51(5):1520. PMID:9710024                  |
| 2q36.3-37.1                                  | Klein KM et al. Epileptic Disord. 2008 Mar;10(1):13-8. PMID:18367426                                                    |
| 2q36                                         | Sander T et al. Hum Mol Genet. 2000 Jun 12;9(10):1465-72. PMID:10888596                                                 |
| 2q33-q36                                     | Ratnapriya R et al. Hum Genet. 2010 Aug;128(2):123-30. Epub 2010 May 14. PMID:20467754                                  |
| 2q24.1                                       | Layouni S et al. Epilepsy Res. 2010 Jun;90(1-2):33-8. Epub 2010 Apr 7. PMID:20378313                                    |
| 2q23.3                                       | Layouni S et al. Epilepsy Res. 2010 Jun;90(1-2):33-8. Epub 2010 Apr 7. PMID:20378313                                    |
| 23-q31                                       | Lopes-Cendes I et al. Am J Hum Genet. 2000 Feb;66(2):698-701. PMID:10677328                                             |
| 19q13.1                                      | Wallace RH et al. Nat Genet. 1998 Aug;19(4):366-70. PMID:9697698                                                        |
| 18q12.2-18q21.32                             | Durner M et al. Ann Neurol. 2001 Mar;49(3):328-35. PMID:11261507                                                        |
| 15q13.3                                      | Elmslie FV et al. Am J Hum Genet. 1996 Sep;59(3):653-63. PMID:8751867                                                   |
| 14q23                                        | Sander T et al. Hum Mol Genet. 2000 Jun 12;9(10):1465-72. PMID:10888596                                                 |
| 11q22.1-23.3                                 | Yang MS et al. Neurosci Lett. 2003 Aug 7;346(3):133-6. PMID:12853102                                                    |
| 5p14.1                                       | Durner M et al. Ann Neurol. 2001 Mar;49(3):328-35. PMID:11261507                                                        |

**Table S5. Genes with Multiple Rare Candidate Epilepsy Variants**

| <b>Gene</b>      | <b>Number of Unique Variants in Gene<br/>that Are Present in at Least One IGE<br/>Case and Absent in Control Cohorts<br/>(Including NHLBI Cohort)</b> | <b>Number of IGE Patients<br/>Harboring One of the Rare<br/>Candidate Variants</b> |
|------------------|-------------------------------------------------------------------------------------------------------------------------------------------------------|------------------------------------------------------------------------------------|
| <i>MYO15A</i>    | 3                                                                                                                                                     | 6                                                                                  |
| <i>USH2A</i>     | 5                                                                                                                                                     | 6                                                                                  |
| <i>NUP205</i>    | 5                                                                                                                                                     | 5                                                                                  |
| <i>HECTD1</i>    | 3                                                                                                                                                     | 4                                                                                  |
| <i>HEXA</i>      | 2                                                                                                                                                     | 4                                                                                  |
| <i>LAMC2</i>     | 3                                                                                                                                                     | 4                                                                                  |
| <i>UTRN</i>      | 2                                                                                                                                                     | 4                                                                                  |
| <i>MXRA5</i>     | 2                                                                                                                                                     | 3                                                                                  |
| <i>UNC45B</i>    | 2                                                                                                                                                     | 3                                                                                  |
| <i>ABCC11</i>    | 2                                                                                                                                                     | 3                                                                                  |
| <i>ANXA1</i>     | 3                                                                                                                                                     | 3                                                                                  |
| <i>CCDC77</i>    | 3                                                                                                                                                     | 3                                                                                  |
| <i>CYP2C9</i>    | 2                                                                                                                                                     | 3                                                                                  |
| <i>SCN7A</i>     | 2                                                                                                                                                     | 3                                                                                  |
| <i>SLC27A5</i>   | 2                                                                                                                                                     | 3                                                                                  |
| <i>TDRD6</i>     | 3                                                                                                                                                     | 3                                                                                  |
| <i>UROS</i>      | 2                                                                                                                                                     | 3                                                                                  |
| <i>ATP10D</i>    | 2                                                                                                                                                     | 3                                                                                  |
| <i>C12orf63</i>  | 2                                                                                                                                                     | 3                                                                                  |
| <i>C14orf155</i> | 2                                                                                                                                                     | 3                                                                                  |
| <i>CNDP2</i>     | 2                                                                                                                                                     | 3                                                                                  |
| <i>DEPDC1B</i>   | 2                                                                                                                                                     | 3                                                                                  |
| <i>DNAH8</i>     | 2                                                                                                                                                     | 3                                                                                  |
| <i>DZIP3</i>     | 3                                                                                                                                                     | 3                                                                                  |
| <i>KIAA0100</i>  | 2                                                                                                                                                     | 3                                                                                  |
| <i>KLF3</i>      | 2                                                                                                                                                     | 3                                                                                  |
| <i>LAMA3</i>     | 3                                                                                                                                                     | 3                                                                                  |
| <i>MDN1</i>      | 2                                                                                                                                                     | 3                                                                                  |
| <i>PIK3R3</i>    | 3                                                                                                                                                     | 3                                                                                  |
| <i>PIWIL3</i>    | 3                                                                                                                                                     | 3                                                                                  |
| <i>PLCE1</i>     | 3                                                                                                                                                     | 3                                                                                  |
| <i>PROX1</i>     | 2                                                                                                                                                     | 3                                                                                  |
| <i>SPECC1L</i>   | 2                                                                                                                                                     | 3                                                                                  |
| <i>SPEN</i>      | 3                                                                                                                                                     | 3                                                                                  |
| <i>VWF</i>       | 2                                                                                                                                                     | 3                                                                                  |
| <i>FAAH2</i>     | 2                                                                                                                                                     | 2                                                                                  |
| <i>UBQLN2</i>    | 2                                                                                                                                                     | 2                                                                                  |
| <i>ATXN7</i>     | 2                                                                                                                                                     | 2                                                                                  |
| <i>KIAA0556</i>  | 2                                                                                                                                                     | 2                                                                                  |
| <i>ARID4A</i>    | 2                                                                                                                                                     | 2                                                                                  |
| <i>C1orf164</i>  | 2                                                                                                                                                     | 2                                                                                  |
| <i>CEACAM5</i>   | 2                                                                                                                                                     | 2                                                                                  |
| <i>CSMD2</i>     | 2                                                                                                                                                     | 2                                                                                  |

|                           |   |   |
|---------------------------|---|---|
| <i>DNAH7</i>              | 2 | 2 |
| <i>DSP</i>                | 2 | 2 |
| <i>EMILIN2</i>            | 2 | 2 |
| <i>FICD</i>               | 2 | 2 |
| <i>HIVEP1</i>             | 2 | 2 |
| <i>KIAA0922</i>           | 2 | 2 |
| <i>KIAA1632</i>           | 2 | 2 |
| <i>LRBA</i>               | 2 | 2 |
| <i>MYH6</i>               | 2 | 2 |
| <i>MYOM1</i>              | 2 | 2 |
| <i>OIT3</i>               | 2 | 2 |
| <i>PCDH9</i>              | 2 | 2 |
| <i>PHF3</i>               | 2 | 2 |
| <i>PKHD1</i>              | 2 | 2 |
| <i>PLXNA3</i>             | 2 | 2 |
| <i>PPL</i>                | 2 | 2 |
| <i>PPP1R13L</i>           | 2 | 2 |
| <i>RNF123</i>             | 2 | 2 |
| <i>RPE65</i>              | 2 | 2 |
| <i>RPUSD2</i>             | 2 | 2 |
| <i>SLC16A4</i>            | 2 | 2 |
| <i>SLC18A1</i>            | 2 | 2 |
| <i>SPHKAP</i>             | 2 | 2 |
| <i>STON1-<br/>GTF2A1L</i> | 2 | 2 |
| <i>TULP4</i>              | 2 | 2 |
| <i>VPS13D</i>             | 2 | 2 |
| <i>ABCB5</i>              | 2 | 2 |
| <i>ABCC3</i>              | 2 | 2 |
| <i>AKAP8</i>              | 2 | 2 |
| <i>ALPK3</i>              | 2 | 2 |
| <i>ARL6</i>               | 2 | 2 |
| <i>ATBF1</i>              | 2 | 2 |
| <i>ATP10A</i>             | 2 | 2 |
| <i>ATXN1</i>              | 2 | 2 |
| <i>BSN</i>                | 2 | 2 |
| <i>CILP</i>               | 2 | 2 |
| <i>CNTNAP2</i>            | 2 | 2 |
| <i>DNAH3</i>              | 2 | 2 |
| <i>DNAH5</i>              | 2 | 2 |
| <i>DOCK8</i>              | 2 | 2 |
| <i>EPHB4</i>              | 2 | 2 |
| <i>FAM83H</i>             | 2 | 2 |
| <i>FAT2</i>               | 2 | 2 |
| <i>FCGBP</i>              | 2 | 2 |
| <i>FGD6</i>               | 2 | 2 |
| <i>GCN1L1</i>             | 2 | 2 |
| <i>GPNMB</i>              | 2 | 2 |

|                 |   |   |
|-----------------|---|---|
| <i>GPR177</i>   | 2 | 2 |
| <i>GSS</i>      | 2 | 2 |
| <i>HMCN1</i>    | 2 | 2 |
| <i>HSPA4L</i>   | 2 | 2 |
| <i>KIAA1109</i> | 2 | 2 |
| <i>MAP2</i>     | 2 | 2 |
| <i>MARVELD2</i> | 2 | 2 |
| <i>MX1</i>      | 2 | 2 |
| <i>MYOM2</i>    | 2 | 2 |
| <i>NR1I2</i>    | 2 | 2 |
| <i>OR4B1</i>    | 2 | 2 |
| <i>PLCB3</i>    | 2 | 2 |
| <i>PLEKHA6</i>  | 2 | 2 |
| <i>PLXNA2</i>   | 2 | 2 |
| <i>PTPRD</i>    | 2 | 2 |
| <i>SALL4</i>    | 2 | 2 |
| <i>SH3PXD2B</i> | 2 | 2 |
| <i>SILV</i>     | 2 | 2 |
| <i>SPG11</i>    | 2 | 2 |
| <i>STOX1</i>    | 2 | 2 |
| <i>TRAK2</i>    | 2 | 2 |
| <i>TXNDC3</i>   | 2 | 2 |
| <i>XKR8</i>     | 2 | 2 |
| <i>ZBED4</i>    | 2 | 2 |
| <i>ZNF592</i>   | 2 | 2 |

---

---
